# Supplementary material for: Single-Cell Analyses of Prostate Cancer Liquid Biopsies Acquired by Apheresis
Source: Oxford University Press journal article supplement (doi:10.1158/1078-0432.ccr-18-0862), 2018-08-09
Supplement: 10780432ccr180862-sup-198672_2_supp_4851248_p5w0dz.pdf [file 10780432ccr180862-sup-198672_2_supp_4851248_p5w0dz.pdf]

**Supplementary Table 1**

| Characteristic                                                                | Value     |
|-------------------------------------------------------------------------------|-----------|
| <b>Age – year</b>                                                             |           |
| Median                                                                        | 70.4      |
| Range                                                                         | 60-77     |
| <b>Time since initial diagnosis of prostate carcinoma to procedure - year</b> |           |
| Median                                                                        | 3.9       |
| Range                                                                         | 2-11.6    |
| <b>No. of metastatic sites</b>                                                |           |
| Median                                                                        | 3         |
| Range                                                                         | 1-3       |
| Bone metastasis No. (%)                                                       | 14 (100%) |
| <b>PSA level (ng/mL)</b>                                                      |           |
| Median                                                                        | 506       |
| Range                                                                         | 41-6089   |
| <b>ECOG^ Performance Status – No. (%)**</b>                                   |           |
| 0                                                                             | 0         |
| 1                                                                             | 14 (100%) |
| <b>Received prior regimens for CRPC - No (%)</b>                              |           |
| 1                                                                             | 1 (7%)    |
| 2                                                                             | 4 (29%)   |
| 3                                                                             | 7 (50%)   |
| ≥4                                                                            | 2 (14%)   |
